# Supplementary material for: Hepatocyte Growth Factor Enhances Antineoplastic Effect of 5-Fluorouracil by Increasing UPP1 Expression in HepG2 Cells
Source: MDPI journal article supplement (doi:10.3390/ijms23169108), 2022-08-14
Supplement: s1 [file s1]

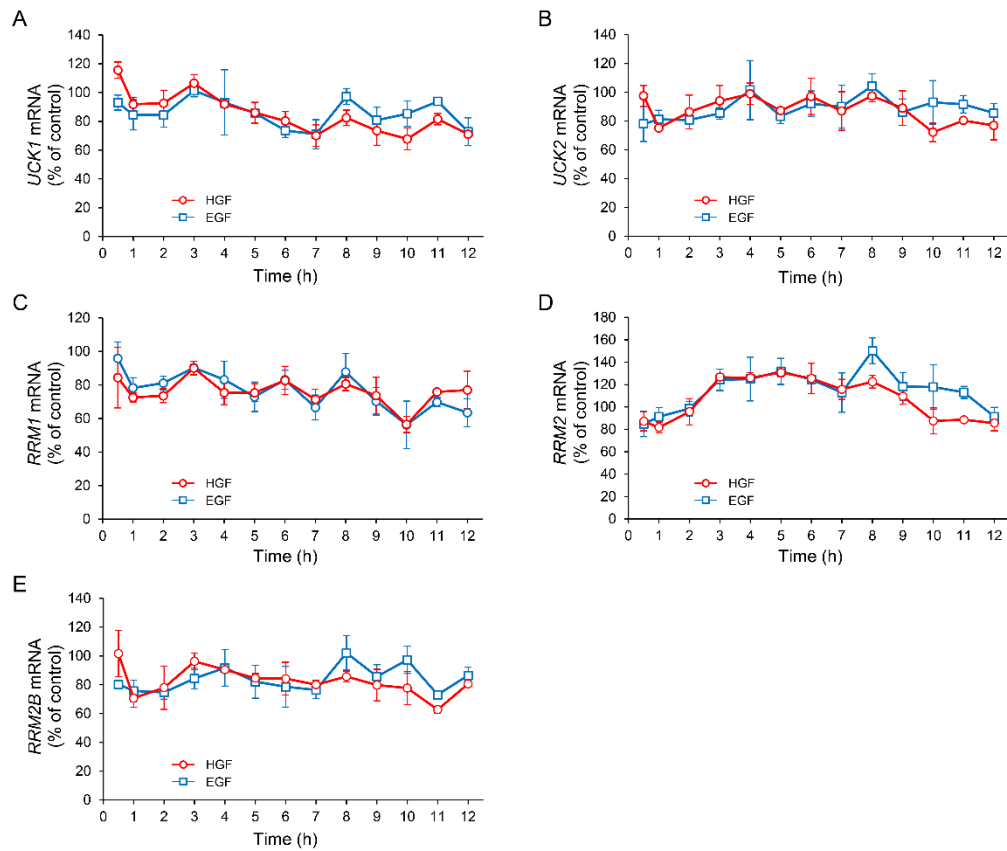

**Figure S1. Effects of HGF and EGF on mRNA expression of *UCK1*, *UCK2*, *RRM1*, *RRM2*, and *RRM2B*.** HepG2 cells were cultured for 24 h in serum-starved medium, and incubation was continued after addition of HGF (50 ng/mL) or EGF (50 ng/mL) for the indicated period. Thereafter, total RNA was extracted. The transcription levels of *UCK1* (A), *UCK2* (B), *RRM1* (C), *RRM2* (D), and *RRM2B* (E) are expressed as a percentage of that in cells not treated with growth factors at 0 h. Each bar represents the mean  $\pm$  SD of 5 experiments.
